# Supplementary material for: Intercomparison of AOD retrievals from GAW-PFR and SKYNET sun photometer networks and the effect of calibration
Source: Copernicus journal article supplement (doi:10.5194/amt-2024-84), 2024-05-23
Supplement: Supplementary file 1 [file amt-2024-84-supplement.pdf]

# Intercomparison of AOD retrievals from GAW-PFR and SKYNET sun photometer networks and calibration effects

Angelos Karanikolas, et al.

Correspondence to: Angelos Karanikolas (angelos.karanikolas@pmodwrc.ch)

## 5 1. Monthly calibration constants used and AOD differences attributed to calibration differences

Table S1: The monthly calibration constants for all instruments and campaigns from ILP calibration ( $V_{0IL}$ ) and calibration transfer from PFR ( $V_{0TR}$ ) in  $\mu A \times 10^{-4}$  with their % differences at 500 nm and 870 nm.

| Instrument | Location  | Year | Month | $V_{0IL500}$ | $V_{0IL870}$ | $V_{0TR500}$ | $V_{0TR870}$ | % difference<br>500 nm | % difference<br>870 nm |
|------------|-----------|------|-------|--------------|--------------|--------------|--------------|------------------------|------------------------|
| POMVDV     | DAVOS I   | 2017 | 8     | 2.828        | 2.229        | 2.848        | 2.234        | -0.69                  | -0.20                  |
| POMVDV     | ROME I    | 2017 | 10    | 2.782        | 2.204        | 2.858        | 2.227        | -2.67                  | -1.01                  |
| POMCNR     | DAVOS II  | 2018 | 7     | 2.751        | 2.300        | 2.780        | 2.324        | -1.05                  | -1.02                  |
| POMCNR     | DAVOS II  | 2018 | 8     | 2.762        | 2.321        | 2.807        | 2.364        | -1.60                  | -1.81                  |
| POMCNR     | DAVOS II  | 2018 | 9     | 2.771        | 2.343        | 2.807        | 2.368        | -1.28                  | -1.07                  |
| POMCNR     | DAVOS II  | 2018 | 10    | 2.766        | 2.346        | 2.802        | 2.364        | -1.27                  | -0.75                  |
| POMCNR     | ROME II   | 2019 | 5     | 2.717        | 2.321        | 2.804        | 2.348        | -3.09                  | -1.14                  |
| POMCNR     | ROME II   | 2019 | 6     | 2.730        | 2.303        | 2.807        | 2.350        | -2.73                  | -1.98                  |
| POMCNR     | ROME II   | 2019 | 7     | 2.737        | 2.299        | 2.836        | 2.366        | -3.49                  | -2.83                  |
| POMCNR     | ROME II   | 2019 | 8     | 2.765        | 2.329        | 2.836        | 2.371        | -2.51                  | -1.76                  |
| POMCNR     | ROME II   | 2019 | 9     | 2.747        | 2.320        | 2.838        | 2.369        | -3.21                  | -2.05                  |
| POM11      | ROME II   | 2019 | 5     | 3.062        | 2.174        | 3.134        | 2.203        | -2.31                  | -1.31                  |
| POM11      | ROME II   | 2019 | 6     | 3.043        | 2.167        | 3.122        | 2.198        | -2.53                  | -1.43                  |
| POM11      | ROME II   | 2019 | 7     | 3.029        | 2.151        | 3.133        | 2.226        | -3.31                  | -3.36                  |
| POM11      | ROME II   | 2019 | 8     | 3.082        | 2.201        | 3.133        | 2.233        | -1.63                  | -1.43                  |
| POMCNR*    | ROME III  | 2021 | 9     | 2.686        | 2.250        | 2.754        | 2.308        | -2.48                  | -2.51                  |
| POMCNR*    | DAVOS III | 2021 | 10    | 2.698        | 2.293        | 2.734        | 2.320        | -1.30                  | -1.14                  |

Table S2: The uncertainties % of the used reference PFR calibrations and the POM monthly calibration transfers based on the PFR at 500 nm and 870 nm. The monthly uncertainty of the calibration transfer is the square root of the sum of the square errors of the PFR calibration uncertainty and the standard deviation of the daily calibration transfers.

| <b>Instrument</b> | <b>Location</b> | <b>Year</b> | <b>Month</b> | <b>U<sub>PFR500</sub> %</b> | <b>U<sub>PFR870</sub> %</b> | <b>U<sub>TR500</sub> %</b> | <b>U<sub>TR870</sub> %</b> |
|-------------------|-----------------|-------------|--------------|-----------------------------|-----------------------------|----------------------------|----------------------------|
| POMVDV            | DAVOS I         | 2017        | 8            | 0.25                        | 0.25                        | 0.51                       | 0.68                       |
| POMVDV            | ROME I          | 2017        | 10           | 0.28                        | 0.32                        | 0.30                       | 0.37                       |
| POMCNR            | DAVOS II        | 2018        | 7            | 0.25                        | 0.25                        | 0.35                       | 0.31                       |
| POMCNR            | DAVOS II        | 2018        | 8            | 0.25                        | 0.25                        | 0.30                       | 0.35                       |
| POMCNR            | DAVOS II        | 2018        | 9            | 0.25                        | 0.25                        | 0.29                       | 0.32                       |
| POMCNR            | DAVOS II        | 2018        | 10           | 0.25                        | 0.25                        | 0.27                       | 0.32                       |
| POMCNR            | ROME II         | 2019        | 5            | 0.28                        | 0.32                        | 0.65                       | 0.66                       |
| POMCNR            | ROME II         | 2019        | 6            | 0.28                        | 0.32                        | 0.80                       | 0.64                       |
| POMCNR            | ROME II         | 2019        | 7            | 0.28                        | 0.32                        | 0.40                       | 0.41                       |
| POMCNR            | ROME II         | 2019        | 8            | 0.28                        | 0.32                        | 0.65                       | 0.45                       |
| POMCNR            | ROME II         | 2019        | 9            | 0.28                        | 0.32                        | 0.36                       | 0.38                       |
| POM11             | ROME II         | 2019        | 5            | 0.28                        | 0.32                        | 0.62                       | 0.63                       |
| POM11             | ROME II         | 2019        | 6            | 0.28                        | 0.32                        | 0.79                       | 0.38                       |
| POM11             | ROME II         | 2019        | 7            | 0.28                        | 0.32                        | 0.42                       | 0.72                       |
| POM11             | ROME II         | 2019        | 8            | 0.28                        | 0.32                        | 0.60                       | 0.43                       |
| POMCNR*           | ROME III        | 2021        | 9            | 0.37                        | 0.39                        | 0.43                       | 0.48                       |
| POMCNR*           | DAVOS III       | 2021        | 10           | 0.25                        | 0.25                        | 0.27                       | 0.29                       |

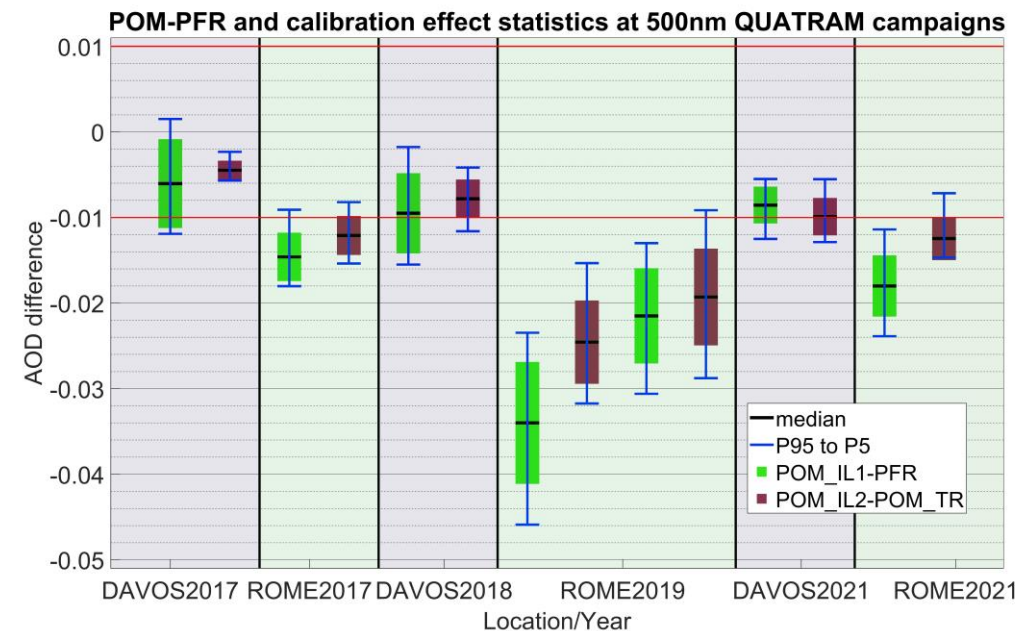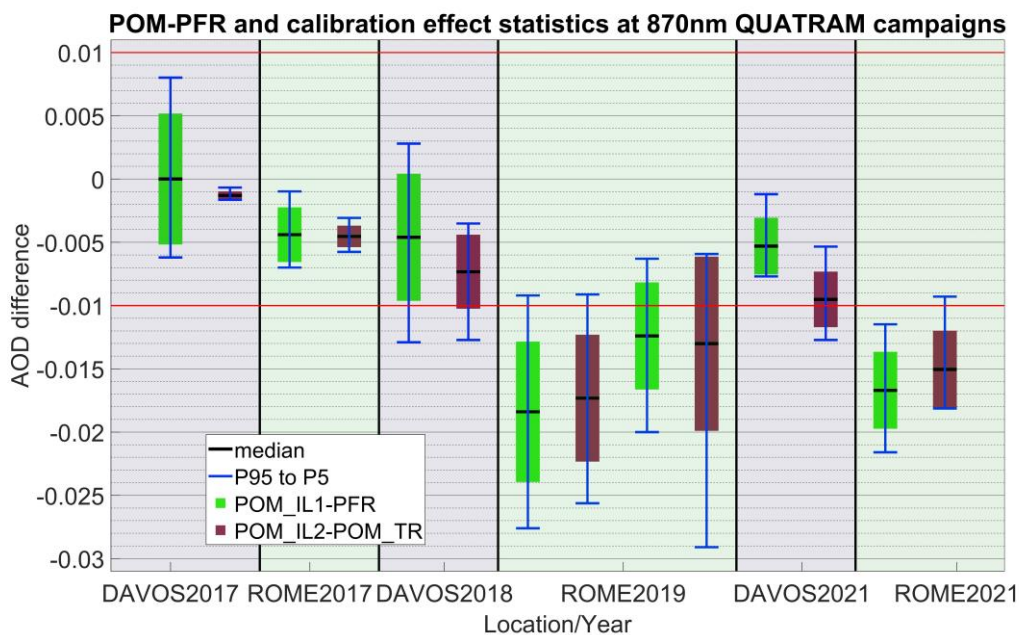

20 **Figure S1:** Box plot of the AOD differences' statistics for all instrument comparisons during both phases of the 3 QUATRAM campaigns. The green boxes correspond to the differences between the original AOD from POMs and PFRs. The red boxes correspond the POM AOD differences retrieved once for each calibration (ILP and transfer from the PFR) using the same post processing algorithm and inputs for ozone absorption and Rayleigh scattering. During ROME 2019 campaign on the left side are the comparisons of POMCNR (master) and on the right side POM11. The black line is the median difference, the size of the boxes

25 denotes the distance between the median and the standard deviation, while the error bars show the 5<sup>th</sup> and the 95<sup>th</sup> percentile of the AOD differences. Top: 500 nm. Bottom: 870 nm.

## 2. PFR calibrations

30 Table S3: The calibrations of the PFRs that were present in the Rome phases of the QUATRAM campaigns (PFRN14 for QUATRAM I and II, PFRN01 for QUATRAM III). The last columns show the % difference of each calibration with the previous. The calibrations were performed in Davos using as reference the PFR triad used for world AOD reference. The instruments measure direct solar irradiance in mV.

| Instrument: PFRN14 |       |     |                |                |                |                | Difference (%) |        |        |        |  |
|--------------------|-------|-----|----------------|----------------|----------------|----------------|----------------|--------|--------|--------|--|
| Year               | Month | Day | V0 368 nm (mV) | V0 412 nm (mV) | V0 500 nm (mV) | V0 870 nm (mV) | 368 nm         | 412 nm | 500 nm | 862 nm |  |
| 2017               | 9     | 21  | 4.210          | 3.809          | 3.806          | 3.551          | -              | -      | -      | -      |  |
| 2018               | 8     | 29  | 4.211          | 3.809          | 3.802          | 3.563          | 0.02           | 0.00   | -0.11  | 0.34   |  |
| 2020               | 6     | 1   | 4.180          | 3.794          | 3.785          | 3.565          | -0.74          | -0.40  | -0.45  | 0.06   |  |

  

| Instrument: PFRN01 |       |     |                |                |                |                | Difference (%) |        |        |        |  |
|--------------------|-------|-----|----------------|----------------|----------------|----------------|----------------|--------|--------|--------|--|
| Year               | Month | Day | V0 368 nm (mV) | V0 412 nm (mV) | V0 500 nm (mV) | V0 870 nm (mV) | 368 nm         | 412 nm | 500 nm | 862 nm |  |
| 2020               | 11    | 7   | 4.031          | 3.511          | 3.725          | 3.380          | -              | -      | -      | -      |  |
| 2021               | 5     | 28  | 4.011          | 3.503          | 3.717          | 3.380          | -0.50          | -0.23  | -0.22  | 0.00   |  |
| 2022               | 9     | 6   | 4.006          | 3.493          | 3.712          | 3.376          | -0.12          | -0.29  | -0.13  | -0.12  |  |

### 3. Imaginary part of refractive index values

Table S4: The values used for the imaginary part of refractive index tests of section 3.2.2.1.

| $\lambda(\text{nm})$ | Davos        |          |               | Rome          |          |               |
|----------------------|--------------|----------|---------------|---------------|----------|---------------|
|                      | median-std k | median k | median +std k | median -std k | median k | median +std k |
| 340                  | 0.0040       | 0.0071   | 0.0186        | 0.0021        | 0.0076   | 0.0145        |
| 400                  | 0.0040       | 0.0070   | 0.0189        | 0.0020        | 0.0074   | 0.0142        |
| 500                  | 0.0040       | 0.0068   | 0.0194        | 0.0019        | 0.0071   | 0.0138        |
| 675                  | 0.0040       | 0.0065   | 0.0204        | 0.0017        | 0.0065   | 0.0130        |
| 870                  | 0.0040       | 0.0072   | 0.0204        | 0.0018        | 0.0079   | 0.0145        |
| 1020                 | 0.0040       | 0.0078   | 0.0203        | 0.0018        | 0.0084   | 0.0135        |

### 4. Surface albedo values

40 Table S5: values used for the surface albedo variation tests of section 3.2.2.1.

| $\lambda(\text{nm})$ | Davos      |        |             | Rome        |        |             |
|----------------------|------------|--------|-------------|-------------|--------|-------------|
|                      | mean-std A | mean A | mean +std A | mean -std A | mean A | mean +std A |
| 340                  | 0.016      | 0.032  | 0.049       | 0.038       | 0.043  | 0.047       |
| 400                  | 0.022      | 0.044  | 0.066       | 0.052       | 0.058  | 0.065       |
| 500                  | 0.046      | 0.070  | 0.095       | 0.067       | 0.076  | 0.084       |
| 675                  | 0.046      | 0.069  | 0.093       | 0.100       | 0.113  | 0.125       |
| 870                  | 0.235      | 0.270  | 0.305       | 0.210       | 0.240  | 0.270       |
| 1020                 | 0.242      | 0.271  | 0.301       | 0.213       | 0.241  | 0.269       |

## 5. Solid view angle values

Table S6: The values used for the solid view angle in  $srx10^{-4}$  variation tests of section 3.2.2.1.

| $\lambda(\text{nm})$ | % max $\Delta\text{SVA}$ | SVA- $\Delta\text{SVA}$ | SVA   | SVA+ $\Delta\text{SVA}$ |
|----------------------|--------------------------|-------------------------|-------|-------------------------|
| 340                  | 9.1                      | 2.202                   | 2.422 | 2.642                   |
| 400                  | 2.6                      | 2.388                   | 2.452 | 2.516                   |
| 500                  | 2.6                      | 2.395                   | 2.459 | 2.523                   |
| 675                  | 2                        | 2.402                   | 2.451 | 2.500                   |
| 870                  | 4.5                      | 2.385                   | 2.497 | 2.609                   |
| 1020                 | 3.8                      | 2.358                   | 2.514 | 2.545                   |

## 45 6. Total ozone column, surface pressure and inputs of the 2<sup>nd</sup> and 3<sup>rd</sup> sensitivity sub-studies

For section 3.2.2.2 the selected values for all the parameters are:

Total ozone column: 400 DU for both locations.

Surface Pressure: 0.85 atm for Davos and 1.02 atm for Rome.

Real part of refractive index: 1.5 for both locations and all wavelengths.

## 50 Imaginary part of refractive index, surface albedo and solid view angle are in table 6.

For section 3.2.2.2 the selected values for all the parameters are in table 7 below.

Table S7: The values used for the imaginary part of refractive index, surface albedo and solid view angle in  $srx10^{-4}$  for the selected tests of section 3.2.2.2.

|                      | Davos                   |              |            | Rome     |                 |
|----------------------|-------------------------|--------------|------------|----------|-----------------|
| $\lambda(\text{nm})$ | SVA- $\Delta\text{SVA}$ | median-std k | mean-std A | median k | mean -<br>std A |

|      |       |        |       |        |       |
|------|-------|--------|-------|--------|-------|
| 340  | 2.202 | 0.0040 | 0.016 | 0.0076 | 0.038 |
| 400  | 2.388 | 0.0040 | 0.022 | 0.0074 | 0.052 |
| 500  | 2.395 | 0.0040 | 0.046 | 0.0071 | 0.067 |
| 675  | 2.402 | 0.0040 | 0.046 | 0.0065 | 0.100 |
| 870  | 2.385 | 0.0040 | 0.235 | 0.0079 | 0.210 |
| 1020 | 2.358 | 0.0040 | 0.242 | 0.0084 | 0.213 |

## 55 7. Real part of refractive index sensitivity

Table S8: The calibration differences % between the calibration transfer from PFR and the ILP calibrations for different values of real part of refractive index.

| Location | Year | Month | Davos: Original (n=1.5) |                         | n=1.33                  |                         | n=1.5                   |                         | n=1.6                   |                         |
|----------|------|-------|-------------------------|-------------------------|-------------------------|-------------------------|-------------------------|-------------------------|-------------------------|-------------------------|
|          |      |       | Rome: Original (n=1.5)  |                         | n=1.33                  |                         | n=1.5                   |                         | n=1.6                   |                         |
|          |      |       | $\Delta V0\%$<br>500 nm | $\Delta V0\%$<br>870 nm |
| DAVOS    | 2018 | 9     | -1.28                   | -1.07                   | -1.10                   | -0.86                   | -1.28                   | -1.02                   | -1.24                   | -1.15                   |
| DAVOS    | 2018 | 10    | -1.27                   | -0.75                   | -1.27                   | -0.75                   | -1.31                   | -0.75                   | -1.24                   | -0.62                   |
| ROME     | 2019 | 7     | -3.49                   | -2.83                   | -3.99                   | -3.09                   | -3.49                   | -3.05                   | -3.49                   | -3.00                   |
| ROME     | 2019 | 8     | -2.51                   | -1.76                   | -2.65                   | -1.72                   | -2.65                   | -1.72                   | -2.65                   | -1.72                   |

## 8. Total ozone column sensitivity

Table S9: The calibration differences % between the calibration transfer from PFR and the ILP calibrations for different values of total ozone column.

|                 |             | <b>Davos: Original (TOC=300 DU)</b> |                                            | <b>TOC=260 DU</b>                          |                                            | <b>TOC=300 DU</b>                          |                                            | <b>TOC=400 DU</b>                          |                                            |                                            |
|-----------------|-------------|-------------------------------------|--------------------------------------------|--------------------------------------------|--------------------------------------------|--------------------------------------------|--------------------------------------------|--------------------------------------------|--------------------------------------------|--------------------------------------------|
|                 |             | <b>Rome: Original (TOC=300 DU)</b>  |                                            | <b>TOC=260 DU</b>                          |                                            | <b>TOC=300 DU</b>                          |                                            | <b>TOC=400 DU</b>                          |                                            |                                            |
| <b>Location</b> | <b>Year</b> | <b>Month</b>                        | <b><math>\Delta V0\%</math><br/>500 mn</b> | <b><math>\Delta V0\%</math><br/>870 nm</b> |
| <b>DAVOS</b>    | 2018        | 9                                   | -1.28                                      | -1.07                                      | -1.35                                      | -1.02                                      | -1.28                                      | -1.02                                      | -1.21                                      | -1.02                                      |
| <b>DAVOS</b>    | 2018        | 10                                  | -1.27                                      | -0.75                                      | -1.31                                      | -0.75                                      | -1.31                                      | -0.75                                      | -0.74                                      | -0.75                                      |
| <b>ROME</b>     | 2019        | 7                                   | -3.49                                      | -2.83                                      | -3.49                                      | -3.05                                      | -3.49                                      | -3.05                                      | -3.92                                      | -3.05                                      |
| <b>ROME</b>     | 2019        | 8                                   | -2.51                                      | -1.76                                      | -2.54                                      | -1.80                                      | -2.54                                      | -1.80                                      | -2.51                                      | -1.80                                      |

65

## 9. Surface pressure sensitivity

Table S10: The calibration differences % between the calibration transfer from PFR and the ILP calibrations for different values of surface pressure.

|                 |             | <b>Davos: Original (P=0.829 atm)</b> |                                            | <b>P=0.8 atm</b>                           |                                            | <b>P=0.83 atm</b>                          |                                            | <b>P=0.85 atm</b>                          |                                            |                                            |
|-----------------|-------------|--------------------------------------|--------------------------------------------|--------------------------------------------|--------------------------------------------|--------------------------------------------|--------------------------------------------|--------------------------------------------|--------------------------------------------|--------------------------------------------|
|                 |             | <b>Rome: Original (P=1 atm)</b>      |                                            | <b>P=0.97 atm</b>                          |                                            | <b>P=1 atm</b>                             |                                            | <b>P=1.02 atm</b>                          |                                            |                                            |
| <b>Location</b> | <b>Year</b> | <b>Month</b>                         | <b><math>\Delta V0\%</math><br/>500 mn</b> | <b><math>\Delta V0\%</math><br/>870 nm</b> |
| <b>DAVOS</b>    | 2018        | 9                                    | -1.28                                      | -1.07                                      | -1.28                                      | -1.02                                      | -1.28                                      | -1.02                                      | -1.13                                      | -0.98                                      |
| <b>DAVOS</b>    | 2018        | 10                                   | -1.27                                      | -0.75                                      | -1.38                                      | -0.62                                      | -1.27                                      | -0.75                                      | -1.16                                      | -0.62                                      |
| <b>ROME</b>     | 2019        | 7                                    | -3.49                                      | -2.83                                      | -3.95                                      | -2.71                                      | -3.49                                      | -3.05                                      | -3.53                                      | -2.83                                      |
| <b>ROME</b>     | 2019        | 8                                    | -2.51                                      | -1.76                                      | -2.58                                      | -1.76                                      | -2.54                                      | -1.80                                      | -2.51                                      | -1.80                                      |

70

75



## 10. Extensive sensitivity test inputs

Here we show the input parameter values for the third sub-study in sections 2.4.3, 3.2.2.3.

Table S11: The used values for the sensitivity tests of IRI, SA and SVA.

| <b>IRI<br/>(unitless)</b> | <b>SA<br/>(unitless)</b> | <b>SVA<br/>(<math>\text{sr} \times 10^{-4}</math>)<br/>at 500<br/>nm</b> | <b>SVA<br/>(<math>\text{sr} \times 10^{-4}</math>)<br/>at 870<br/>nm</b> |
|---------------------------|--------------------------|--------------------------------------------------------------------------|--------------------------------------------------------------------------|
| 0.0003                    | 0.01                     | 2.250                                                                    | 2.300                                                                    |
| 0.001                     | 0.035                    | 2.395                                                                    | 2.385                                                                    |
| 0.01                      | 0.08                     | 2.430                                                                    | 2.450                                                                    |
| 0.05                      | 0.15                     | 2.459                                                                    | 2.497                                                                    |
| 0.1                       | 0.2                      | 2.490                                                                    | 2.550                                                                    |
| 0.2                       | 0.3                      | 2.523                                                                    | 2.609                                                                    |
| 0.4                       | 0.5                      | 2.700                                                                    | 2.750                                                                    |

80

85

## 11. ILP median SSA and variability

90 Table S12: The monthly medians of the SSA from the SKYRAD 4.2 and MRI inversions.

| SSA values QUATRAM II: |      |       | SKY4.2_500<br>nm | SKY4.2_<br>870 nm | MRI_500<br>nm | MRI_870 nm |                           |
|------------------------|------|-------|------------------|-------------------|---------------|------------|---------------------------|
| Location               | Year | Month | Median SSA       |                   |               |            | Number of<br>measurements |
| Davos II               | 2018 | 7     | 0.952            | 0.917             | 0.959         | 0.935      | 194                       |
| Davos II               | 2018 | 8     | 0.958            | 0.933             | 0.964         | 0.944      | 404                       |
| Davos II               | 2018 | 9     | 0.950            | 0.923             | 0.958         | 0.940      | 332                       |
| Davos II               | 2018 | 10    | 0.947            | 0.917             | 0.953         | 0.932      | 184                       |
| Rome II                | 2019 | 5     | 0.941            | 0.922             | 0.949         | 0.933      | 238                       |
| Rome II                | 2019 | 6     | 0.928            | 0.911             | 0.937         | 0.924      | 1215                      |
| Rome II                | 2019 | 7     | 0.937            | 0.917             | 0.945         | 0.927      | 1178                      |
| Rome II                | 2019 | 8     | 0.939            | 0.919             | 0.946         | 0.928      | 1123                      |
| Rome II                | 2019 | 9     | 0.932            | 0.921             | 0.940         | 0.929      | 680                       |

Table S13: The monthly medians of the daily P80-P20 values for the SSA from the SKYRAD 4.2 and MRI inversions. We also added the % calibration differences between the calibration transfer from the PFRs and the ILP both from Skyrad 4.2 and MRI.

| SSA variability |      |       | SKY4.2_500<br>nm        | SKY4.2_870<br>nm | MRI_500<br>nm | MRI_87<br>0 nm | SKY-TR            |                   | MRI-TR            |                   |
|-----------------|------|-------|-------------------------|------------------|---------------|----------------|-------------------|-------------------|-------------------|-------------------|
| Location        | Year | Month | Median of daily P80-P20 |                  |               |                | $\Delta V_0$<br>% | $\Delta V_0$<br>% | $\Delta V_0$<br>% | $\Delta V_0$<br>% |
|                 |      |       |                         |                  |               |                | 500<br>nm         | 870<br>nm         | 500<br>nm         | 870<br>nm         |
| Davos II        | 2018 | 7     | 0.0130                  | 0.0223           | 0.0039        | 0.0073         | -1.05             | -1.02             | -1.46             | -1.21             |
| Davos II        | 2018 | 8     | 0.0093                  | 0.0170           | 0.0033        | 0.0065         | -1.60             | -1.81             | -1.07             | -4.04             |
| Davos II        | 2018 | 9     | 0.0077                  | 0.0158           | 0.0037        | 0.0052         | -1.28             | -1.07             | -0.32             | -0.43             |
| Davos II        | 2018 | 10    | 0.0120                  | 0.0203           | 0.0049        | 0.0089         | -1.27             | -0.75             | -0.74             | 0.65              |
| Rome II         | 2019 | 5     | 0.0093                  | 0.0097           | 0.0061        | 0.0068         | -3.09             | -1.14             | -2.73             | -1.33             |
| Rome II         | 2019 | 6     | 0.0108                  | 0.0093           | 0.0060        | 0.0052         | -2.73             | -1.98             | -2.51             | -1.97             |
| Rome II         | 2019 | 7     | 0.0087                  | 0.0080           | 0.0059        | 0.0048         | -3.49             | -2.83             | -3.96             | -3.14             |
| Rome II         | 2019 | 8     | 0.0068                  | 0.0078           | 0.0053        | 0.0053         | -2.51             | -1.76             | -2.69             | -1.92             |
| Rome II         | 2019 | 9     | 0.0121                  | 0.0124           | 0.0067        | 0.0068         | -3.21             | -2.05             | -2.80             | -2.36             |

## 12. Air mass dependence of AOD differences

100 Table S14: The AOD difference between the AOD from the Skyrad 4.2 inversions and the AOD from the PFR for different subsets of the air mass separately (no smaller than 2 and no larger than 1.5).

| Location | Air mass | Median AOD difference |        | Number of data |
|----------|----------|-----------------------|--------|----------------|
|          |          | 500 nm                | 870 nm |                |
| DAVOS    | $\geq 2$ | -0.003                | 0.000  | 277            |
| ROME     | $\geq 2$ | -0.005                | 0.000  | 201            |

|       |            |        |        |     |
|-------|------------|--------|--------|-----|
| DAVOS | $\leq 1.5$ | 0.000  | 0.001  | 443 |
| ROME  | $\leq 1.5$ | -0.012 | -0.004 | 743 |

Table S15: Least squares-linear fit of the AOD difference between the AOD from the Skyrad 4.2 inversions and the AOD from the PFR in relation to the air mass and the root mean square error (RMSE) of the fit.

**Linear fit of AOD difference in relation to the air mass**

| Location | Wavelength (nm) | Slope  | Intercept | RMSE  | Number of measurements |
|----------|-----------------|--------|-----------|-------|------------------------|
| DAVOS    | 500             | -0.001 | -0.001    | 0.009 | 1129                   |
| ROME     | 500             | 0.008  | -0.022    | 0.010 | 1231                   |
| DAVOS    | 870             | -0.001 | 0.002     | 0.004 | 1129                   |
| ROME     | 870             | 0.004  | -0.008    | 0.007 | 1231                   |
